# Supplementary material
Source: HighWire-hosted journal article supplement (http://www.qdcxjkg.com/highwire/filestream/113618/field_highwire_adjunct_files/0/supplementary_material.pdf)
Supplement: supplementary_material.pdf [file supplementary_material.pdf]

**SUPPLEMENTARY MATERIAL**

**HEMODYNAMICS, EXERCISE CAPACITY AND CLINICAL EVENTS IN  
PULMONARY ARTERIAL HYPERTENSION**

Gianluigi Savarese, MD, Francesca Musella, MD, Carmen D'Amore, MD, Teresa Losco, MD,  
Caterina Marciano, MD, Paola Gargiulo, MD, Giuseppe Rengo, MD, Santo Dellegrottaglie, MD,  
PhD, Eduardo Bossone, MD, PhD, Dario Leosco, MD, PhD, Pasquale Perrone-Filardi, MD, PhD

**Supplementary Material Table S1.** Potential effect modifier of  $\Delta$ PAP,  $\Delta$ PVR,  $\Delta$ RAP and  $\Delta$ CI with change in  $\text{Tau}^2$  and statistical significance for each outcome.

|                                                         | $\Delta$ PAP             |         | $\Delta$ PVR             |         | $\Delta$ CI              |         | $\Delta$ RAP             |         |
|---------------------------------------------------------|--------------------------|---------|--------------------------|---------|--------------------------|---------|--------------------------|---------|
|                                                         | Change in $\text{Tau}^2$ | p Value | Change in $\text{Tau}^2$ | p Value | Change in $\text{Tau}^2$ | p Value | Change in $\text{Tau}^2$ | p Value |
| <b>Composite Outcome</b>                                |                          |         |                          |         |                          |         |                          |         |
| <b>Year of publication</b>                              | -0.29                    | 0.78    | 0.71                     | 0.49    | -0.80                    | 0.45    | 0.16                     | 0.88    |
| <b>Women</b>                                            | -0.40                    | 0.70    | 0.81                     | 0.44    | -0.86                    | 0.42    | 0.00                     | 1.0     |
| <b>Age</b>                                              | 0.09                     | 0.93    | 1.46                     | 0.18    | -1.74                    | 0.12    | 0.63                     | 0.55    |
| <b>White race</b>                                       | 0.43                     | 0.68    | 0.51                     | 0.63    | 0.47                     | 0.67    | -0.50                    | 0.64    |
| <b>Idiopathic and/or familiar and/or hereditary PAH</b> | -0.28                    | 0.78    | 1.48                     | 0.17    | -1.13                    | 0.30    | 0.70                     | 0.51    |
| <b>Connective disease PAH</b>                           | -0.29                    | 0.77    | 1.74                     | 0.11    | -1.19                    | 0.27    | 0.68                     | 0.51    |
| <b>Congenital heart disease PAH</b>                     | -0.72                    | 0.49    | 0.22                     | 0.83    | -0.30                    | 0.77    | 0.08                     | 0.94    |
| <b>Duration of follow-up</b>                            | -0.36                    | 0.73    | 0.72                     | 0.49    | -0.76                    | 0.47    | 1.00                     | 0.35    |
| <b>Functional class I</b>                               | -0.51                    | 0.62    | 0.95                     | 0.36    | -0.79                    | 0.46    | -0.01                    | 0.99    |
| <b>Functional class II</b>                              | -0.48                    | 0.64    | 0.79                     | 0.45    | -0.83                    | 0.43    | 0.74                     | 0.48    |
| <b>Functional class III</b>                             | -0.49                    | 0.63    | 0.86                     | 0.41    | -0.85                    | 0.42    | 0.84                     | 0.43    |
| <b>Functional class IV</b>                              | -0.55                    | 0.59    | 0.45                     | 0.66    | -0.59                    | 0.58    | 0.22                     | 0.83    |
| <b>Detski Quality Score</b>                             | -0.39                    | 0.70    | 0.40                     | 0.70    | -0.48                    | 0.65    | -0.06                    | 0.96    |
| <b><math>\Delta</math>6MWD</b>                          | 0.20                     | 0.84    | 0.18                     | 0.86    | -1.15                    | 0.30    | 1.08                     | 0.33    |
| <b>Baseline PAP</b>                                     | -0.74                    | 0.47    | 0.90                     | 0.39    | -1.40                    | 0.20    | 0.30                     | 0.77    |
| <b><math>\Delta</math>PAP</b>                           | NA                       | NA      | 0.99                     | 0.34    | -0.77                    | 0.47    | 0.30                     | 0.77    |
| <b>Baseline PVR</b>                                     | -0.51                    | 0.62    | 0.53                     | 0.60    | -0.56                    | 0.59    | 0.50                     | 0.63    |
| <b><math>\Delta</math>PVR</b>                           | -0.48                    | 0.64    | NA                       | NA      | -0.80                    | 0.45    | 0.54                     | 0.61    |
| <b>Baseline CI</b>                                      | -0.08                    | 0.94    | 0.83                     | 0.43    | -0.77                    | 0.47    | 0.56                     | 0.59    |
| <b><math>\Delta</math>CI</b>                            | -0.38                    | 0.71    | -0.62                    | 0.56    | NA                       | NA      | 0.68                     | 0.52    |
| <b>Baseline RAP</b>                                     | -0.23                    | 0.82    | 0.43                     | 0.68    | -0.57                    | 0.58    | 0.20                     | 0.85    |
| <b><math>\Delta</math>RAP</b>                           | -0.17                    | 0.87    | 0.41                     | 0.69    | -0.62                    | 0.56    | NA                       | NA      |

|                                                            |       |      |       |      |       |      |       |      |
|------------------------------------------------------------|-------|------|-------|------|-------|------|-------|------|
| <b>Studies with most favorable changes in hemodynamics</b> | 1.21  | 0.29 | -0.90 | 0.43 | 1.02  | 0.41 | 1.52  | 0.22 |
| <b>All-cause death</b>                                     |       |      |       |      |       |      |       |      |
| <b>Year of publication</b>                                 | 0.52  | 0.62 | 0.06  | 0.96 | -0.04 | 0.97 | 0.11  | 0.92 |
| <b>Women</b>                                               | 0.52  | 0.62 | 0.18  | 0.87 | 0.23  | 0.83 | -0.21 | 0.84 |
| <b>Age</b>                                                 | 0.52  | 0.62 | 0.03  | 0.98 | 0.19  | 0.86 | 0.06  | 0.96 |
| <b>White race</b>                                          | 0.72  | 0.51 | 0.62  | 0.57 | -0.08 | 0.94 | -0.07 | 0.95 |
| <b>Idiopathic and/or familiar and/or hereditary PAH</b>    | 0.38  | 0.71 | 0.21  | 0.84 | -0.00 | 1.00 | 0.07  | 0.94 |
| <b>Connective disease PAH</b>                              | 0.56  | 0.60 | 0.10  | 0.92 | -0.08 | 0.94 | 0.10  | 0.93 |
| <b>Congenital heart disease PAH</b>                        | -0.16 | 0.88 | 0.03  | 0.98 | 0.16  | 0.88 | 0.07  | 0.95 |
| <b>Duration of follow-up</b>                               | 0.77  | 0.47 | -0.06 | 0.95 | 0.21  | 0.84 | -0.03 | 0.98 |
| <b>Functional class I</b>                                  | -0.14 | 0.89 | -0.12 | 0.91 | 0.11  | 0.92 | 0.11  | 0.91 |
| <b>Functional class II</b>                                 | 0.56  | 0.59 | 0.18  | 0.86 | 0.08  | 0.94 | 0.23  | 0.83 |
| <b>Functional class III</b>                                | 0.55  | 0.60 | 0.12  | 0.91 | 0.15  | 0.89 | 0.14  | 0.89 |
| <b>Functional class IV</b>                                 | 0.64  | 0.55 | 0.19  | 0.86 | -0.13 | 0.90 | 0.17  | 0.87 |
| <b>Detski Quality Score</b>                                | 0.58  | 0.58 | 0.11  | 0.92 | -0.13 | 0.90 | 0.24  | 0.82 |
| <b>Δ6MWD</b>                                               | 0.73  | 0.50 | -0.23 | 0.83 | 0.39  | 0.72 | -0.21 | 0.85 |
| <b>Baseline PAP</b>                                        | 0.57  | 0.59 | -0.04 | 0.97 | 0.13  | 0.90 | 0.19  | 0.86 |
| <b>ΔPAP</b>                                                | NA    | NA   | -0.51 | 0.63 | 0.07  | 0.95 | 0.04  | 0.97 |
| <b>Baseline PVR</b>                                        | 0.70  | 0.51 | 0.12  | 0.91 | 0.15  | 0.89 | 0.17  | 0.87 |
| <b>ΔPVR</b>                                                | 0.74  | 0.49 | NA    | NA   | 0.32  | 0.77 | 0.05  | 0.96 |
| <b>Baseline CI</b>                                         | -0.20 | 0.85 | 0.02  | 0.98 | 0.12  | 0.91 | 0.17  | 0.87 |
| <b>ΔCI</b>                                                 | -0.08 | 0.94 | 0.27  | 0.80 | 0.16  | 0.88 | 0.16  | 0.88 |
| <b>Baseline RAP</b>                                        | -0.10 | 0.93 | 0.15  | 0.89 | -0.13 | 0.90 | 0.33  | 0.76 |
| <b>ΔRAP</b>                                                | -0.17 | 0.88 | -0.02 | 0.98 | 0.23  | 0.83 | NA    | NA   |
| <b>Studies with most favorable changes in</b>              | 0.66  | 0.55 | -0.73 | 0.52 | 1.29  | 0.42 | 1.04  | 0.41 |

| <b>hemodynamics</b>                                                      |       |      |       |      |       |      |       |      |
|--------------------------------------------------------------------------|-------|------|-------|------|-------|------|-------|------|
| <b>Hospitalization for PAH and/or lung or heart-lung transplantation</b> |       |      |       |      |       |      |       |      |
| <b>Year of publication</b>                                               | -1.75 | 0.14 | -0.96 | 0.39 | 0.88  | 0.47 | -1.04 | 0.38 |
| <b>Women</b>                                                             | 0.18  | 0.86 | 0.42  | 0.69 | -0.52 | 0.65 | -0.46 | 0.68 |
| <b>Age</b>                                                               | 0.06  | 0.95 | 0.36  | 0.74 | -0.17 | 0.88 | -1.68 | 0.19 |
| <b>White race</b>                                                        | 0.63  | 0.56 | -0.39 | 0.72 | 0.37  | 0.77 | -0.55 | 0.63 |
| <b>Idiopathic and/or familiar<br/>and/or hereditary PAH</b>              | 0.10  | 0.92 | 0.41  | 0.70 | -0.76 | 0.53 | -0.31 | 0.77 |
| <b>Connective disease PAH</b>                                            | 0.69  | 0.53 | 0.64  | 0.57 | -0.12 | 0.92 | -0.12 | 0.91 |
| <b>Congenital heart disease<br/>PAH</b>                                  | -1.84 | 0.16 | -0.09 | 0.93 | -0.19 | 0.86 | -0.29 | 0.79 |
| <b>Duration of follow-up</b>                                             | 0.56  | 0.60 | 0.57  | 0.60 | -0.61 | 0.59 | 0.39  | 0.73 |
| <b>Functional class I</b>                                                | -0.22 | 0.83 | 0.43  | 0.69 | -0.75 | 0.53 | -0.77 | 0.50 |
| <b>Functional class II</b>                                               | 0.15  | 0.89 | 0.44  | 0.68 | 0.22  | 0.85 | 0.24  | 0.82 |
| <b>Functional class III</b>                                              | 0.21  | 0.84 | 0.42  | 0.69 | 0.07  | 0.95 | 0.25  | 0.82 |
| <b>Functional class IV</b>                                               | 0.03  | 0.97 | 0.55  | 0.61 | 0.38  | 0.74 | -0.01 | 0.99 |
| <b>Detski Quality Score</b>                                              | -0.70 | 0.54 | -0.27 | 0.80 | -0.03 | 0.98 | -0.30 | 0.78 |
| <b>Δ6MWD</b>                                                             | -0.23 | 0.83 | -0.25 | 0.81 | 0.97  | 0.51 | 0.13  | 0.91 |
| <b>Baseline PAP</b>                                                      | -0.41 | 0.70 | 0.27  | 0.80 | -0.78 | 0.52 | -0.68 | 0.55 |
| <b>ΔPAP</b>                                                              | NA    | NA   | 0.26  | 0.81 | -1.38 | 0.30 | 0.06  | 0.95 |
| <b>Baseline PVR</b>                                                      | 0.38  | 0.72 | -0.25 | 0.81 | -0.34 | 0.77 | 0.93  | 0.42 |
| <b>ΔPVR</b>                                                              | -0.01 | 0.99 | NA    | NA   | -1.19 | 0.35 | 0.57  | 0.63 |
| <b>Baseline CI</b>                                                       | -0.19 | 0.86 | 0.22  | 0.85 | -0.32 | 0.78 | 0.19  | 0.86 |
| <b>ΔCI</b>                                                               | -1.27 | 0.33 | -1.09 | 0.39 | NA    | NA   | 0.59  | 0.61 |
| <b>Baseline RAP</b>                                                      | -0.66 | 0.55 | -0.17 | 0.88 | -0.01 | 0.99 | 0.51  | 0.65 |
| <b>ΔRAP</b>                                                              | -0.69 | 0.54 | 0.31  | 0.78 | -0.63 | 0.59 | NA    | NA   |
| <b>Studies with most<br/>favorable changes in<br/>hemodynamics</b>       | 0.59  | 0.61 | NA    | NA   | NA    | NA   | NA    | NA   |
| <b>Initiation of PAH rescue therapy</b>                                  |       |      |       |      |       |      |       |      |

|                                                                    |       |      |       |      |       |      |       |      |
|--------------------------------------------------------------------|-------|------|-------|------|-------|------|-------|------|
| <b>Year of publication</b>                                         | 0.10  | 0.92 | 0.73  | 0.48 | -1.43 | 0.18 | -0.02 | 0.98 |
| <b>Women</b>                                                       | 0.32  | 0.75 | 0.54  | 0.60 | -0.87 | 0.40 | -0.59 | 0.56 |
| <b>Age</b>                                                         | 0.65  | 0.53 | 0.81  | 0.43 | -1.53 | 0.16 | 0.00  | 1.00 |
| <b>White race</b>                                                  | 0.72  | 0.49 | 0.63  | 0.55 | -0.45 | 0.67 | -1.81 | 0.12 |
| <b>Idiopathic and/or familial<br/>and/or hereditary PAH</b>        | 0.46  | 0.65 | 1.28  | 0.22 | -1.70 | 0.12 | 0.51  | 0.62 |
| <b>Connective disease PAH</b>                                      | 0.08  | 0.94 | 1.25  | 0.24 | -1.53 | 0.16 | 0.30  | 0.77 |
| <b>Congenital heart disease<br/>PAH</b>                            | -0.44 | 0.67 | 0.07  | 0.95 | -0.18 | 0.86 | -0.33 | 0.75 |
| <b>Duration of follow-up</b>                                       | 0.47  | 0.64 | 0.47  | 0.64 | -0.96 | 0.36 | 0.46  | 0.66 |
| <b>Functional class I</b>                                          | 0.06  | 0.95 | 0.88  | 0.39 | -1.05 | 0.32 | -0.02 | 0.98 |
| <b>Functional class II</b>                                         | 0.22  | 0.83 | 0.66  | 0.52 | -1.27 | 0.23 | 0.57  | 0.58 |
| <b>Functional class III</b>                                        | 0.22  | 0.83 | 0.65  | 0.53 | -1.21 | 0.25 | 0.64  | 0.54 |
| <b>Functional class IV</b>                                         | 0.20  | 0.84 | 0.62  | 0.55 | -1.08 | 0.31 | 0.04  | 0.96 |
| <b>Detski Quality Score</b>                                        | 0.29  | 0.77 | 0.50  | 0.63 | -0.89 | 0.39 | -0.49 | 0.64 |
| <b>Δ6MWD</b>                                                       | 0.95  | 0.36 | 0.11  | 0.92 | -0.72 | 0.49 | 0.83  | 0.43 |
| <b>Baseline PAP</b>                                                | -0.62 | 0.55 | 0.31  | 0.76 | -0.82 | 0.43 | -0.05 | 0.96 |
| <b>ΔPAP</b>                                                        | NA    | NA   | 0.53  | 0.60 | -0.42 | 0.68 | -0.07 | 0.95 |
| <b>Baseline PVR</b>                                                | 0.39  | 0.70 | -0.21 | 0.83 | -0.91 | 0.39 | 0.23  | 0.82 |
| <b>ΔPVR</b>                                                        | 0.09  | 0.93 | NA    | NA   | -0.57 | 0.59 | -0.22 | 0.83 |
| <b>Baseline CI</b>                                                 | 0.20  | 0.85 | 0.55  | 0.59 | -1.10 | 0.30 | 0.35  | 0.73 |
| <b>ΔCI</b>                                                         | 0.25  | 0.81 | -0.36 | 0.72 | NA    | NA   | -0.05 | 0.96 |
| <b>Baseline RAP</b>                                                | 0.16  | 0.87 | 0.79  | 0.45 | -1.58 | 0.15 | 0.30  | 0.77 |
| <b>ΔRAP</b>                                                        | 0.04  | 0.97 | 0.52  | 0.62 | -0.90 | 0.39 | NA    | NA   |
| <b>Studies with most<br/>favorable changes in<br/>hemodynamics</b> | NA    | NA   | NA    | NA   | NA    | NA   | NA    | NA   |

PAH: pulmonary arterial hypertension

PVR: pulmonary vascular resistance

PAP: pulmonary artery pressure

CI: cardiac index

RAP: right atrial pressure

NA: not available

**Supplementary Material Figure S1.** OR estimate of all-cause death in active treatment groups compared with control groups.

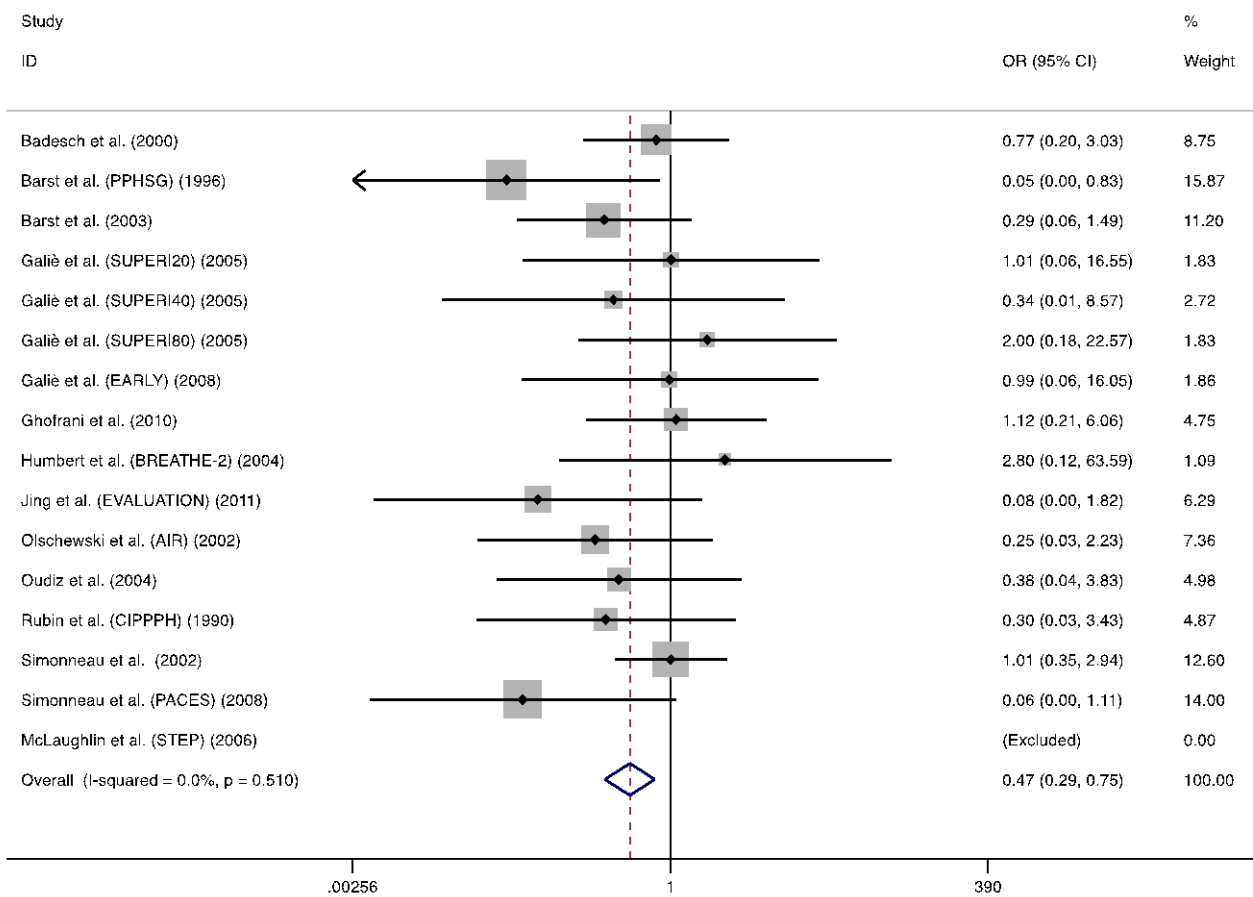

**Supplementary Material Figure S2.** OR estimate of hospitalization for PAH and/or lung or heart-lung transplantation in active treatment groups compared with control groups.

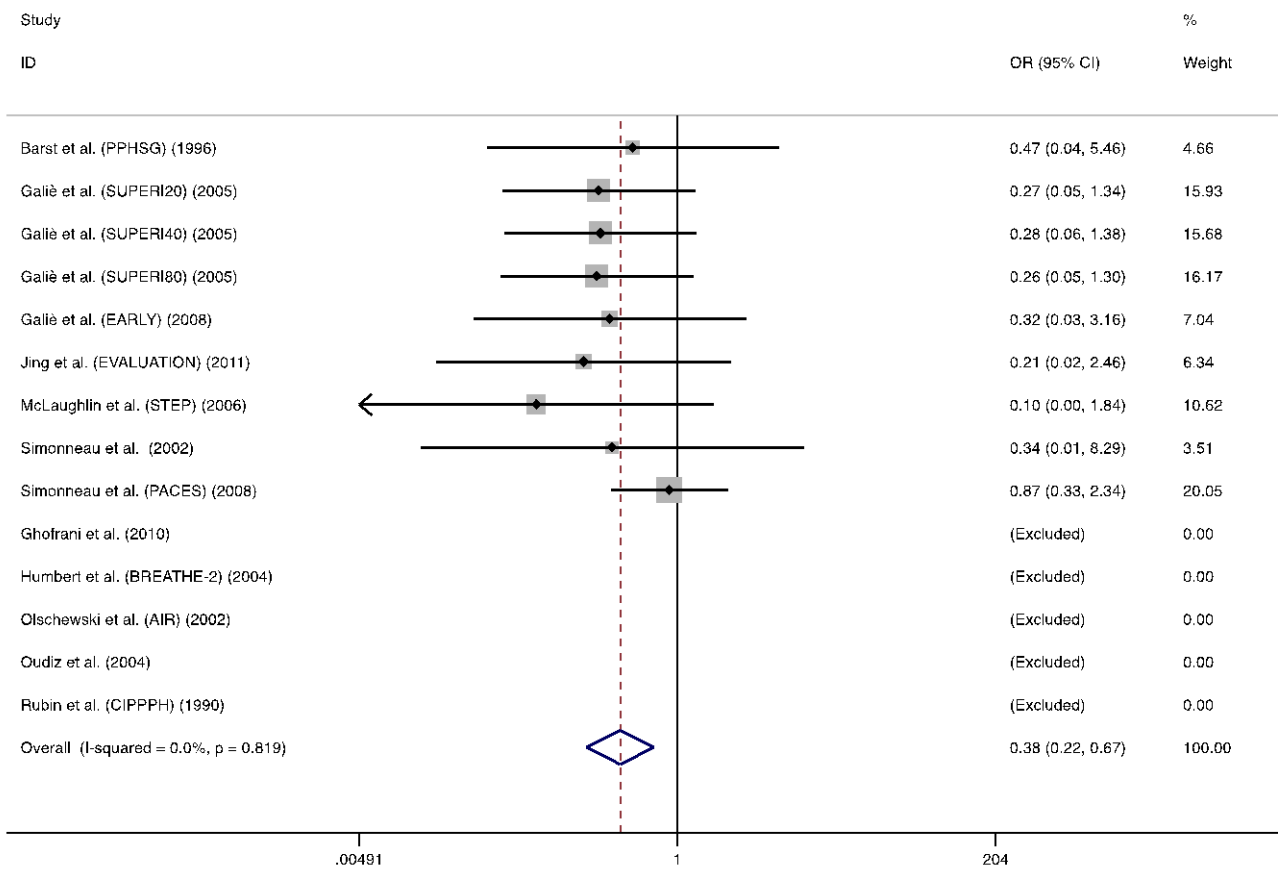

**Supplementary Material Figure S3.** OR estimate of initiation of PAH rescue therapy in active treatment groups compared with control groups.



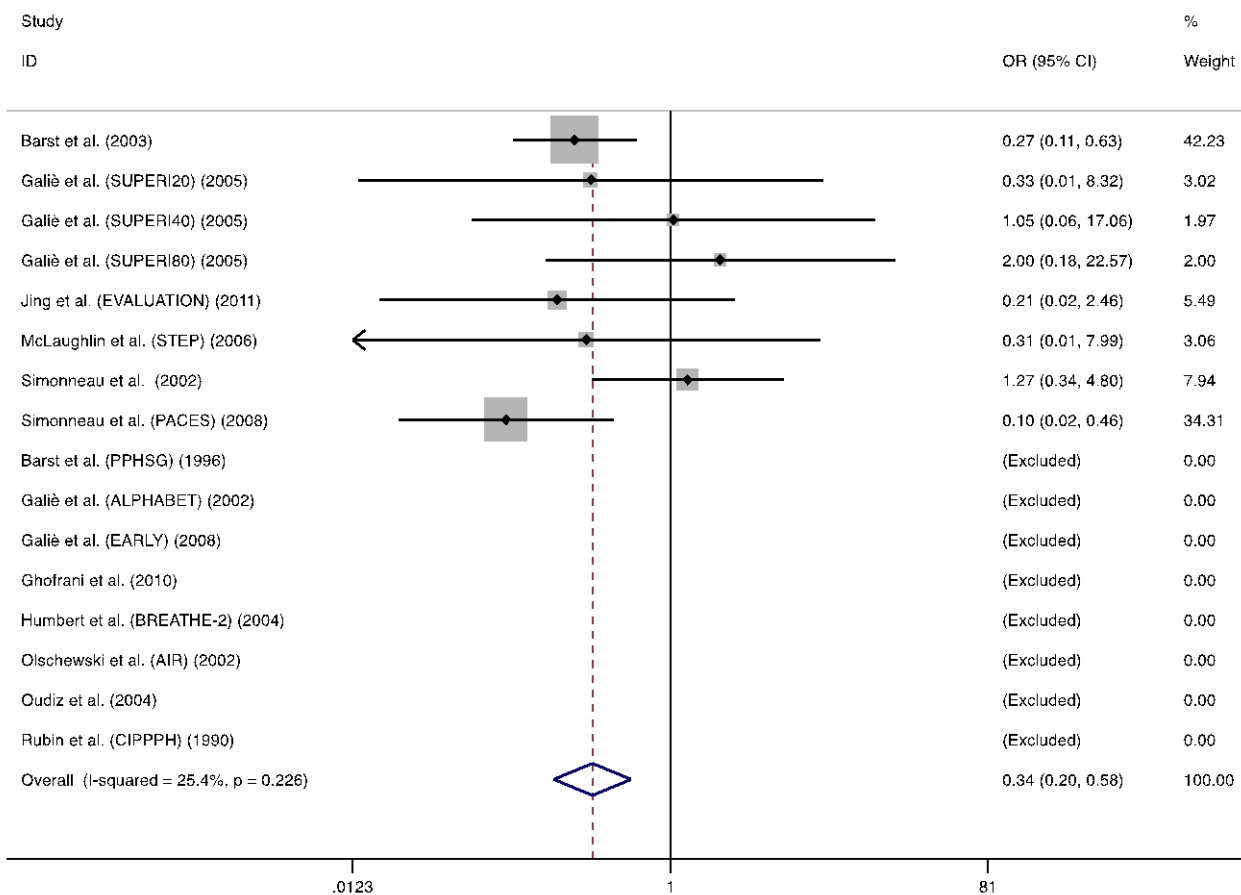

**Supplementary Material Figure S4.** Meta-regression between all-cause death and  $\Delta$ PAP (A),  $\Delta$ PVR (B),  $\Delta$ CI (C), and  $\Delta$ RAP (D).

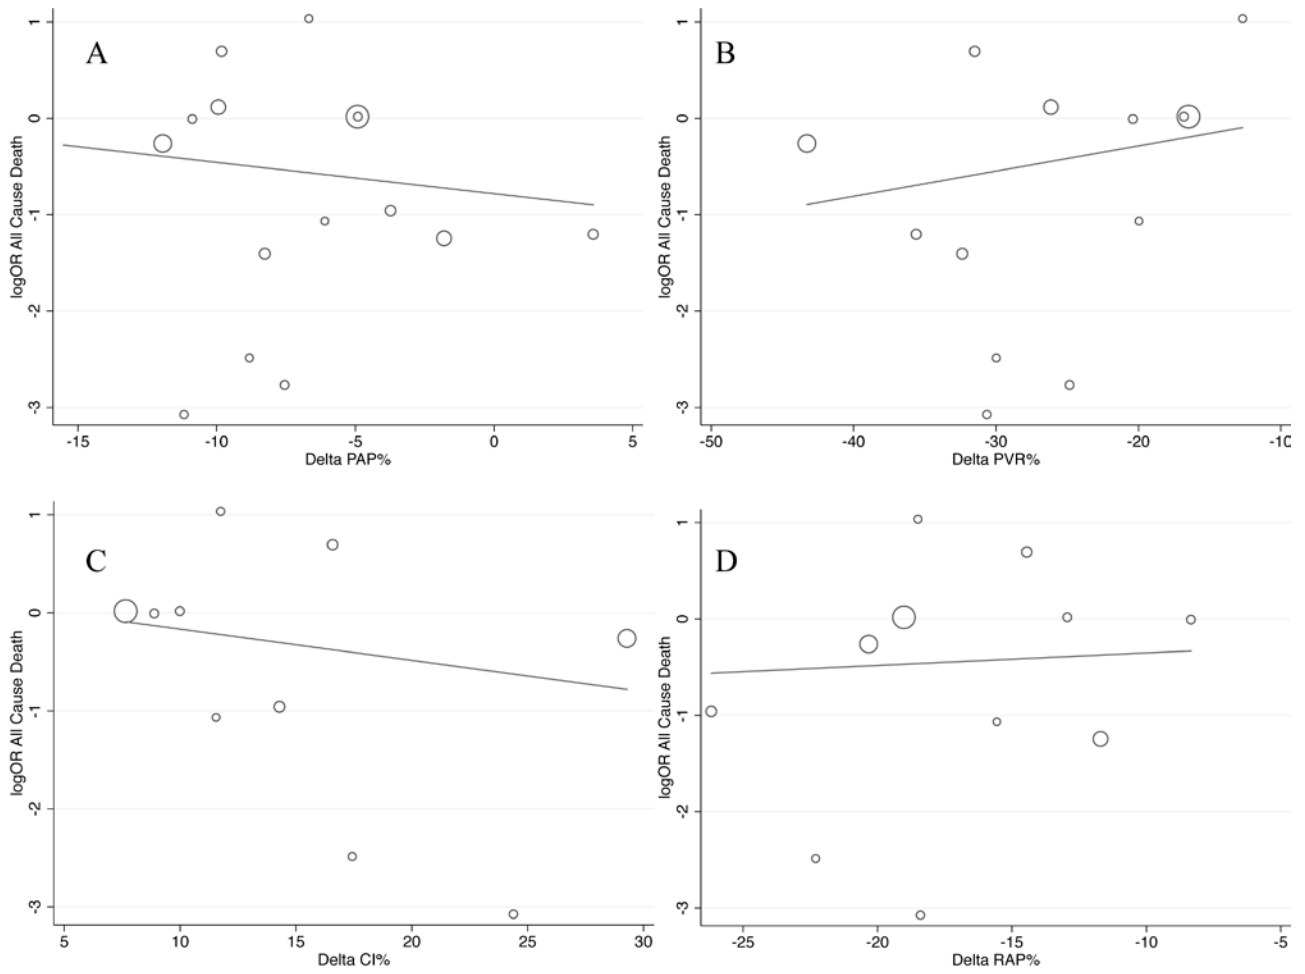

PVR: pulmonary vascular resistance

CI: cardiac index

PAP: pulmonary artery pressure

RAP: right atrial pressure

**Supplementary Material Figure S5.** Meta-regression between hospitalization for PAH and/or lung or heart-lung transplantation and  $\Delta$ PAP (A),  $\Delta$ PVR (B),  $\Delta$ CI (C) and  $\Delta$ RAP (D).

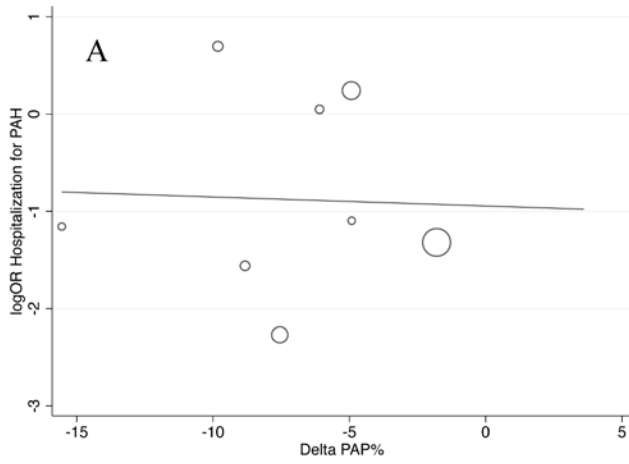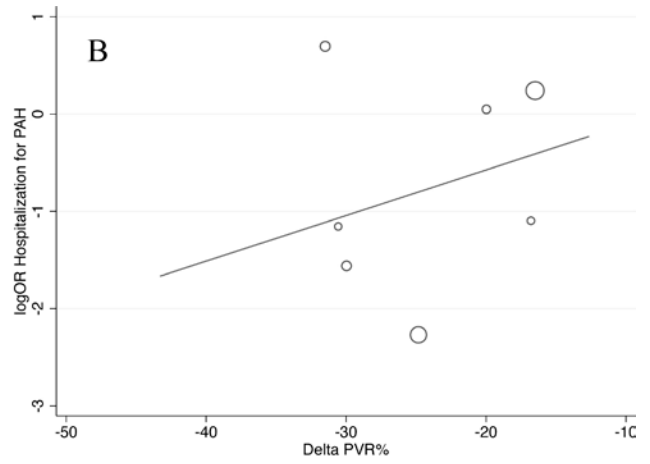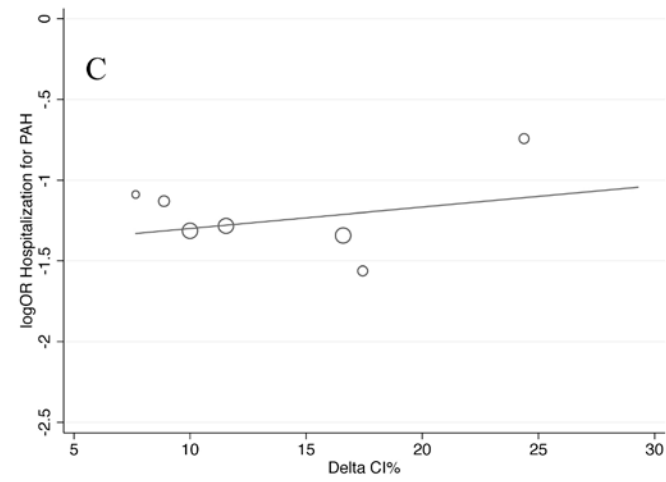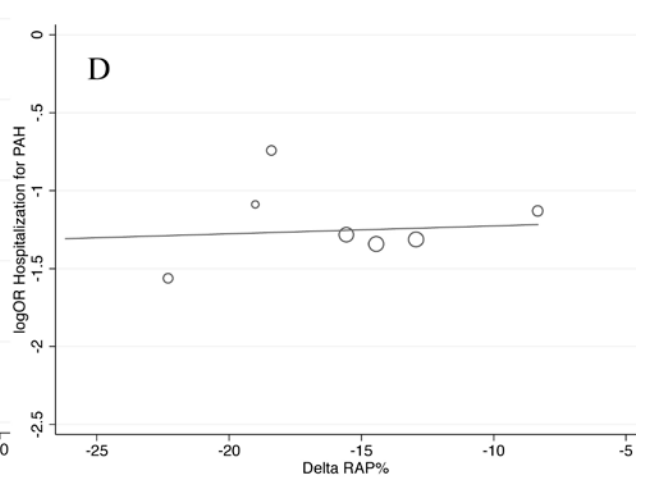

PVR: pulmonary vascular resistance

CI: cardiac index

PAP: pulmonary artery pressure

RAP: right atrial pressure

**Supplementary Material Figure S6.** Meta-regression between initiation of PAH rescue therapy and  $\Delta$ PAP (A),  $\Delta$ PVR (B),  $\Delta$ CI (C) and  $\Delta$ RAP (D).

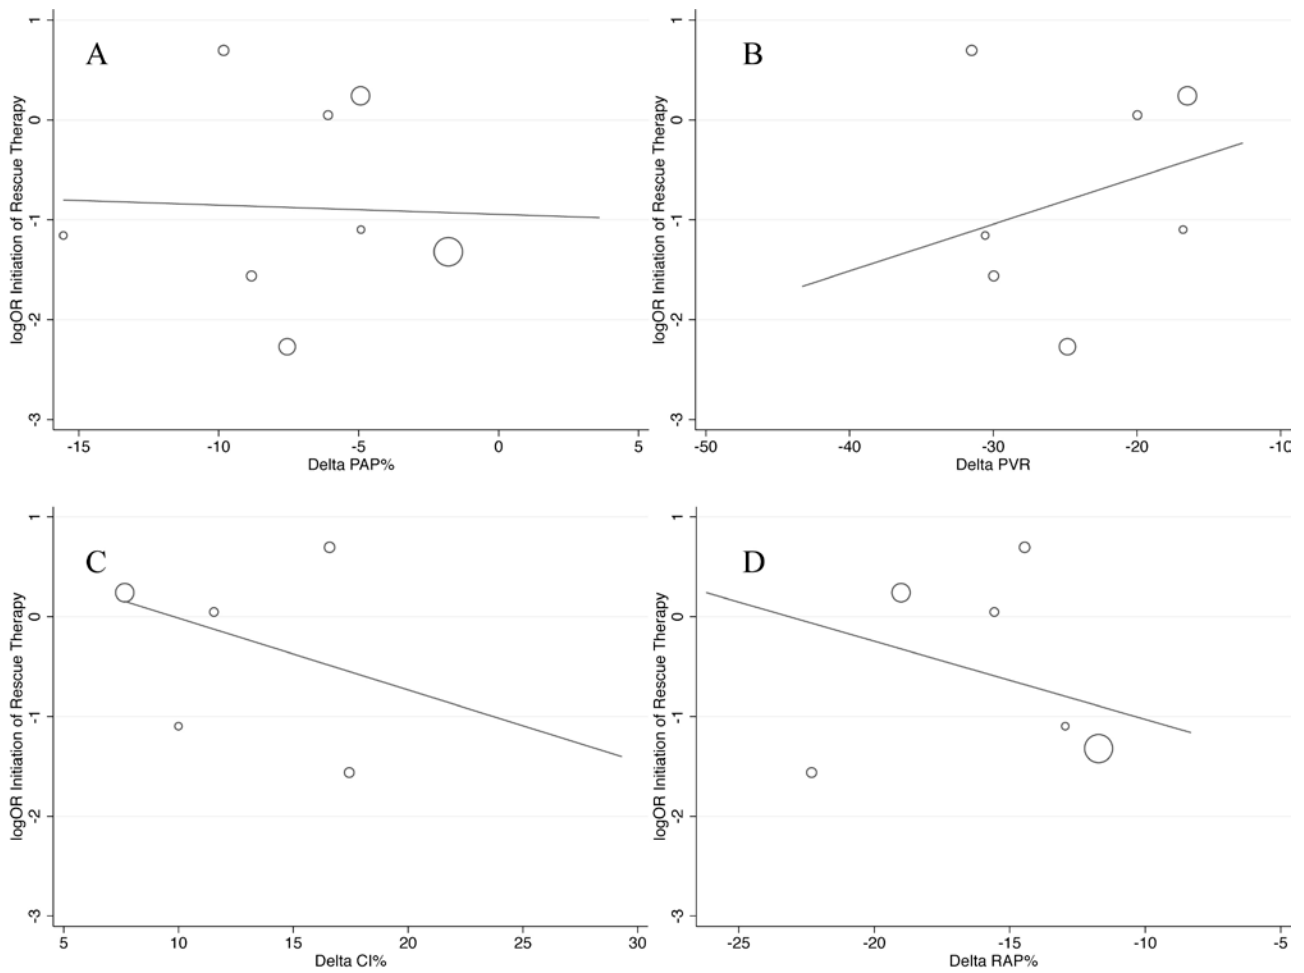

PVR: pulmonary vascular resistance

CI: cardiac index

PAP: pulmonary artery pressure

RAP: right atrial pressure
